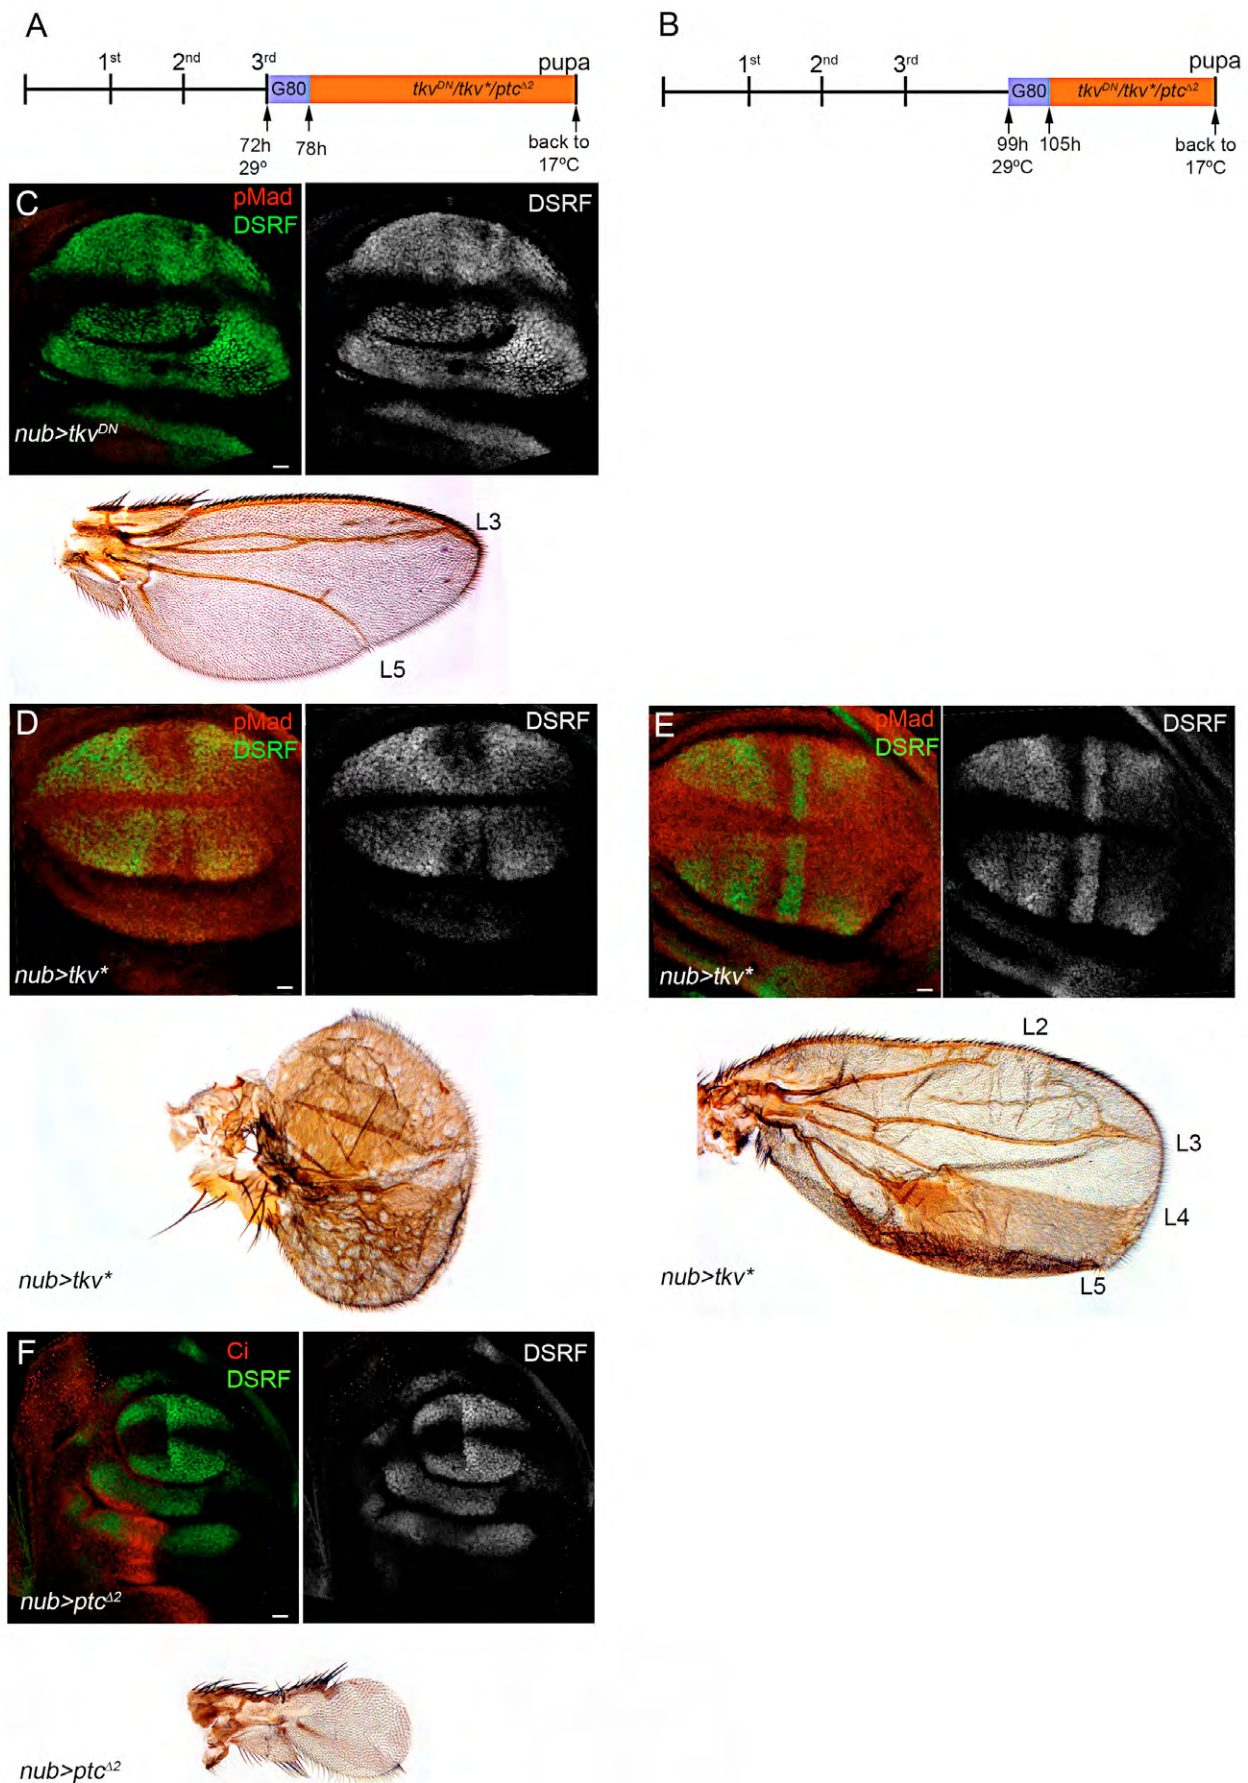

**Fig. S1. Genetic alteration of Dpp and Hh signaling in early versus late third instar wing discs.** (A,B) Temperature changes performed to activate transgene expression over time (first, second and third larval instars; pupa: onset of pupariation). (C) *nub>tkv<sup>DN</sup>* at 78 hours. (D) *nub>tkv<sup>\*</sup>* disc at 78 hours. (E) *nub>tkv<sup>\*</sup>* at 105 hours. (F) *nub>ptc<sup>Δ2</sup>* at 78 hours. Scale bars: 15  $\mu$ m.

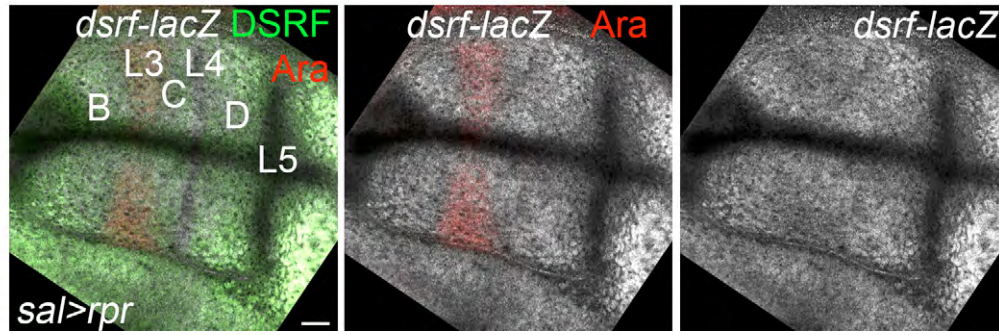

**Fig. S2. Cell lineage of *dsrf-lacZ* in *sal>rpr* discs 20 hours after cell death.** The whole central domain was regenerated. Note that all B-L3-C-L4-D regenerated domains contained *dsrf-lacZ*. Only L5 lacked *dsrf-lacZ*, suggesting that this vein did not undergo respecification. Green, anti-DSRF; red, anti-Ara; gray, *dsrf-lacZ*. Scale bar: 15  $\mu$ m.

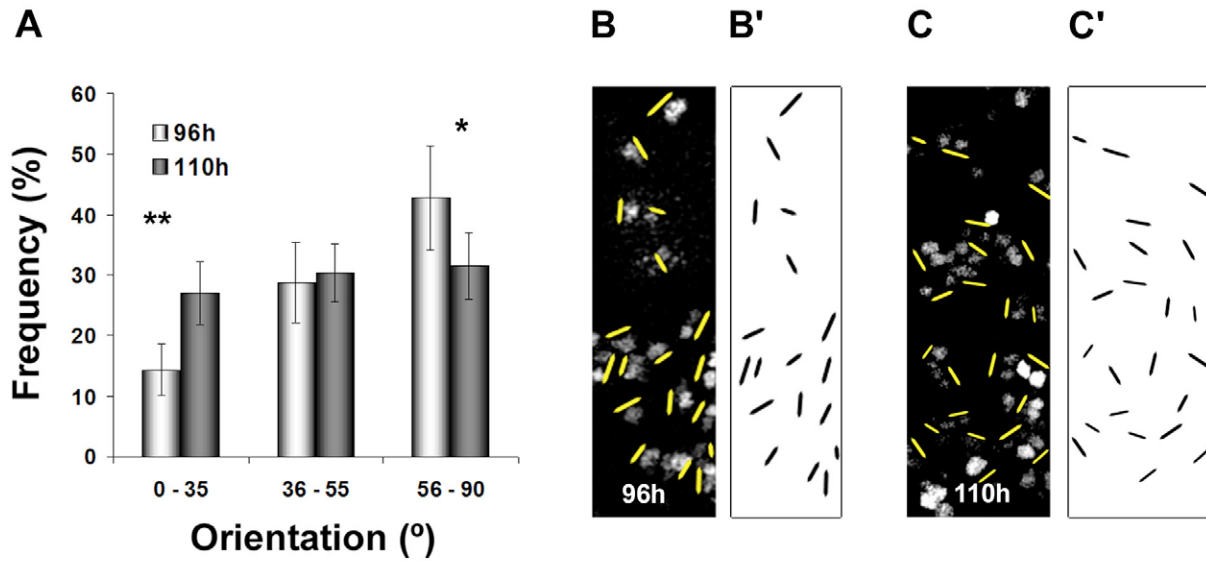

**Fig. S3. Clonal analysis in growing discs.** (A) Distribution of two cell clones with respect to the DV boundary in the *ptc* domain of wing discs at 96 and 110 hours of development. (B, B') Two cell clones in a 96-hour disc. (C, C') Two cell clones in a 110-hour disc. Yellow and black lines in both B and C indicate clone orientation. \* $P < 0.001$ , \*\* $P < 0.005$ , Student's *t*-test.
